# Modelización hidrológica de la cuenca alta del río Nalón (Asturias) para la determinación de recurso disponible destinado al abastecimiento de agua potable

## *Hydrological modeling of the upper Nalón river basin (Asturias) for the quantification of available resource for drinking water supply*

Jesús Miguel Fernández-Rodríguez<sup>a</sup>, María Cristina Miralles-Rivera<sup>b</sup> y Eduardo Álvarez-Álvarez<sup>b,\*c</sup>

<sup>a</sup> Consorcio de Aguas de Asturias, C/Santa Susana 15, 33001, Oviedo, Asturias, España.

<sup>b</sup> TRAGSATEC, Avenida Galicia, 44, 33005, Oviedo, Asturias, España.

<sup>c</sup> Escuela Politécnica de Mieres (Universidad de Oviedo) Área de Ingeniería Hidráulica, C/ Gonzalo Gutiérrez Quirós s/n. 33600, Mieres, Asturias, España.

E-mail: <sup>a</sup>jfr@consorcioaa.com, <sup>b</sup>mmirall2@tragsa.es, <sup>c</sup>edualvarez@uniovi.es

\*Autor para correspondencia

Recibido: 19/04/2022

Aceptado: 27/04/2022

Publicado: 30/04/2022

**Citar como:** Fernández-Rodríguez, J.M., Miralles-Rivera, M.C., Álvarez-Álvarez, E. 2022. Hydrological modeling of the upper Nalón river basin (Asturias) for the quantification of available resource for drinking water supply. *Ingeniería del agua*, 26(2), 125-138. <https://doi.org/10.4995/ia.2022.17572>

## RESUMEN

El presente artículo describe los estudios efectuados para valorar la calidad de la información histórica relativa al régimen de aportaciones del río Nalón, y el recurso hidráulico disponible en el embalse de Rioseco, punto de captación del sistema de abastecimiento a la zona central Asturias, ya que se cuestiona la fiabilidad de la metodología que históricamente se ha seguido para calcular la serie de caudales de la cuenca intermedia entre Tanes y Rioseco. Para ello, partiendo de las aportaciones disponibles en el embalse de Tanes (ubicado a 5 km. aguas arriba de Rioseco), cuyo régimen se encuentra menos alterado y por tanto la calidad de los datos es superior, se emplea la herramienta de modelización hidrológica TETIS para calibrar y validar un modelo hidrológico que, posteriormente, permita determinar los recursos hidráulicos disponibles en el embalse de Rioseco, los cuales carecen prácticamente de regulación. Los resultados obtenidos permiten concluir la falta de consistencia de la información histórica relativa a los recursos aportados por dicha cuenca intermedia, y la conveniencia de considerar los resultados de la modelización en futuros estudios encaminados a determinar la garantía del sistema de abastecimiento.

**Palabras clave** | recurso hidráulico, garantía de abastecimiento, modelo hidrológico, Tetis, hidrología.

## ABSTRACT

*This article describes the studies carried out to assess the quality of the historical information on the inflow regime of the Nalón river and the hydraulic resource available in the Rioseco reservoir, the catchment point of the supply system for the central area of Asturias, since the reliability of the methodology that has historically been used to calculate the average daily flows of the intermediate basin between Tanes and Rioseco is questioned. To this end, starting from the available contributions in the Tanes reservoir (located 5 km upstream from Rioseco), whose regime is less altered, and the quality of the data is higher, TETIS software is used to calibrate and validate a hydrological model to determine the available water resources in the Rioseco reservoir, which are practically unregulated. The results obtained conclude that the historical information on the water resources provided by this intermediate basin is unreliable, and that it would be interesting to consider it in future studies aimed at determining the security of the supply system.*

**Key words** | water resource; security of supply; hydrological model, TETIS; hydrology.

## INTRODUCCIÓN

El sistema de embalses de Tanes y Rioseco reciben los recursos hidráulicos de las subcuencas correspondientes a los ríos Nalón y Alba, y una intercuenca ubicada entre ambos embalses correspondiente a un tramo de unos 5 kilómetros del río Nalón y sus pequeños afluentes (Figura 1), formando la denominada cuenca alta del río Nalón.

La construcción de ambos embalses, fue promovida en los años 70 por el Consorcio de Aguas de Asturias y la entonces Hidroeléctrica del Cantábrico SA (actualmente EDP España S.A.U.), con la doble finalidad de servir como elemento de regulación de los recursos hidráulicos de la cuenca alta del río Nalón tanto para abastecimiento como para generación de energía eléctrica mediante una central hidráulica reversible que opera entre ambos embalses, con unas potencias de 133 MW en generación y 112 MW en bombeo.

El embalse de Tanes dispone de una capacidad total de 33.27 hm<sup>3</sup>, de los cuales tan solo 23.70 hm<sup>3</sup> son útiles, y regula los recursos procedentes de los 264 km<sup>2</sup> de la subcuenca del río Nalón para alimentación de la central hidroeléctrica reversible de Tanes; mientras que el embalse de Rioseco, sirve de contra embalse de la central hidroeléctrica y depósito de regulación de agua bruta para la captación de sistema de abastecimiento, dispone de una capacidad total de embalse de 3.72 hm<sup>3</sup> y un volumen útil de 2.40 hm<sup>3</sup>, para una área vertiente de 337 km<sup>2</sup> suma de la subcuenca del río Nalón vertiente a Tanes y de la que denominaremos como subcuenca intermedia que engloba la subcuenca del río Alba y la intercuenca entre embalses.

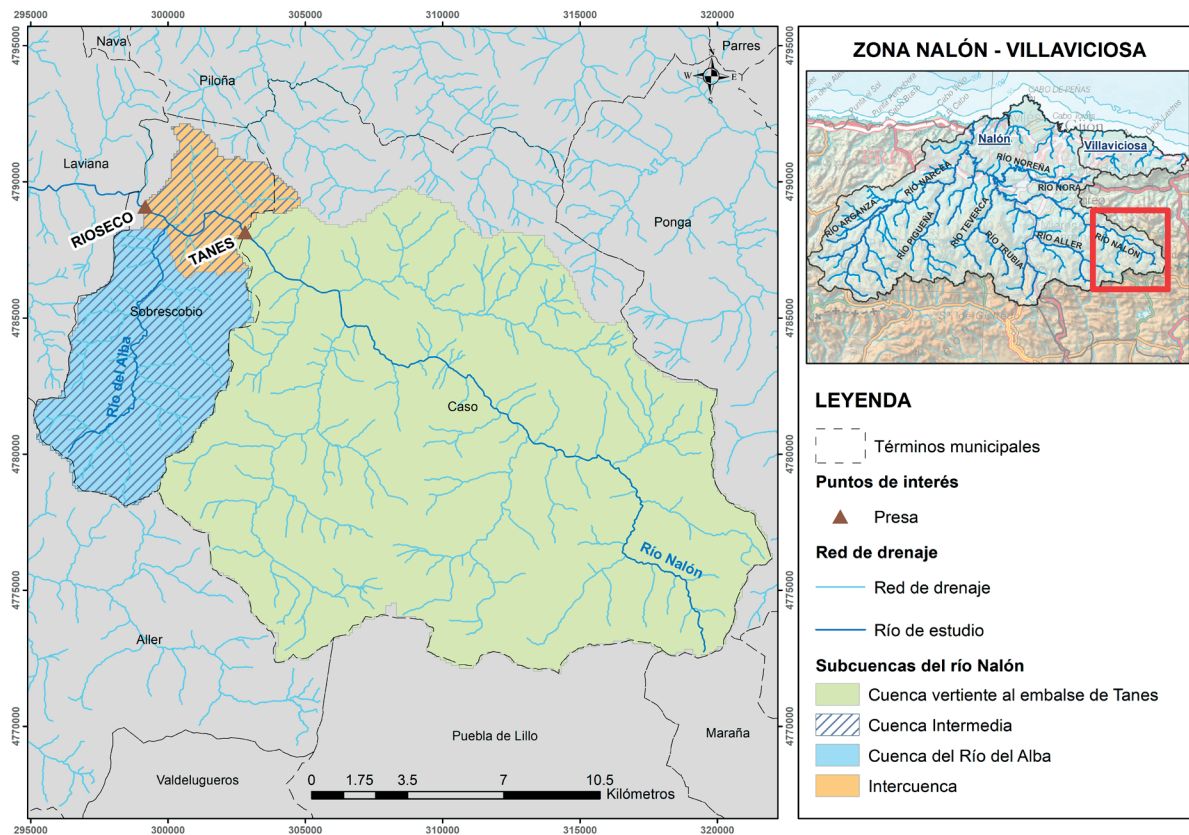

Figura 1| Ubicación geográfica de las subcuencas de estudio.

Estos embalses constituyen el único elemento de regulación para garantizar el abastecimiento de agua potable a los 800 000 habitantes y principales industrias de la zona central de la Comunidad Autónoma del Principado de Asturias. Para ello, el Consorcio de Aguas de Asturias dispone de una concesión para extraer hasta 100 hm<sup>3</sup>/año de agua con destino al abastecimiento,

con un caudal máximo instantáneo de 3.5 m<sup>3</sup>/s, efectuando su potabilización en la ETAP de Rioseco, ubicada al pie de la presa de Rioseco, y que constituye la cabecera del sistema de abastecimiento a la zona central de Asturias, el cual conduce íntegramente por gravedad las aguas potabilizadas a través de más de 300 km. de conducciones hasta todos los puntos de entrega a las redes de distribución municipal o industrial.

La aprobación en noviembre de 2018 del Plan de Implantación y Gestión Adaptativa del régimen de caudales ecológicos (Confederación Hidrográfica del Cantábrico, 2018), desarrollado en el ámbito de la planificación hidrológica de la cuenca, impone por una parte la restitución de un régimen de caudales ecológicos en el embalse de Tanes, condición que hasta entonces no existía, y por otra modifica el régimen de restitución del embalse de Rioseco.

Para analizar los efectos del nuevo régimen de explotación de los embalses sobre la garantía del sistema de abastecimiento y previo al desarrollo de un modelo completo de planificación y gestión de recursos en la cuenca (Andreu et al., 1996; Estrada, 1997; Gutiérrez-Enríquez y Aristizábal-Rodríguez, 2007; Sulis, 2013), se precisa en primer lugar determinar la calidad de los datos históricos de las aportaciones en el punto de captación.

En el caso presentado, una parte de las aportaciones recibidas en el embalse de Rioseco, han sido hasta la fecha estimadas mediante técnicas que carecen del rigor necesario, esto es mediante técnicas de proporcionalidad y técnicas de medición aproximadas. El objetivo del estudio es analizar la calidad de las series de recursos hidrológicos disponibles en la cuenca de Rioseco. Para ello, se calibrará un modelo hidrológico en la subcuenca del río Nalón vertiente al embalse de Tanes, utilizando las series históricas de datos hidrológicos existentes en dicho embalse y que han sido obtenidos con un alto grado de fiabilidad. Posteriormente, dicho modelo ajustado se aplicará en la subcuenca vertiente al embalse de Rioseco por su condición de proximidad.

Los resultados demuestran que las aportaciones, utilizadas históricamente en Rioseco, presentan un importante problema de fiabilidad derivada de la metodología utilizada para estimar las aportaciones de la subcuenca intermedia (las cuales carecen prácticamente de regulación efectiva como consecuencia del reducido volumen útil del embalse de Rioseco), por lo que de cara al desarrollo de futuros estudios, conviene sustituirlas por las nuevas generadas mediante el modelo hidrológico obtenido.

---

## MATERIALES Y MÉTODOS

En este apartado, inicialmente se presenta la información histórica disponible relativa al régimen de aportaciones de los embalses objeto de estudio, así como la metodología seguida para su obtención. A continuación, se describe el proceso seguido para calibrar un modelo hidrológico ajustado a la cuenca, desarrollado mediante la herramienta de simulación hidrológica TETIS utilizando datos meteorológicos e hidrogeológicos de la zona, y su aplicación para estimar la calidad de la información histórica disponible para la subcuenca entre ambos embalses.

### Procedimientos para cálculo de aportaciones en Tanes y Rioseco

Se dispone de la serie histórica de aportaciones diarias al embalse de Tanes desde enero de 1978 hasta la actualidad, determinadas mediante el balance diario de los volúmenes turbinados, aliviados, y la evolución del nivel de agua embalsada, que permite conocer el volumen embalsado a partir de una función algebraica deducida en los estudios realizados en 1978 (Consortio de Aguas de Asturias, Hidrocantábrico, 1978). Esta serie se considera muy fiable ya que presenta únicamente como variable de difícil computo el volumen aliviado por coronación, que se produce únicamente durante 21 días de un total de 42 años de serie histórica completa. Sin embargo, dentro de la subcuenca vertiente, y con efectos para la modelización, se ubica la captación de Los Arrudos, en la cual la Empresa Municipal de Aguas de Gijón dispone de una concesión desde 1928 para captar hasta 200 L/s, disponiendo únicamente de registros de información a partir del año 2011.

Previamente al presente estudio, los datos de aportaciones diarias en el embalse de Rioseco, han sido obtenidos utilizando las siguientes metodologías de aproximación:

- Desde octubre de 1982 hasta diciembre de 1993, de conformidad con los estudios elaborados (Consortio de Aguas de Asturias, Hidrocantábrico, 1978), las aportaciones han sido estimadas multiplicando las correspondientes al embalse de

Tanes por 1.19; valor obtenido aplicando la fórmula de Becerril (Heras, 1983), teniendo en cuenta la relación de áreas vertientes y que ambas ubicaciones están en una misma zona.

- Desde diciembre de 1993 hasta la actualidad, se han determinado mediante el cómputo del balance diario resultante de los volúmenes turbinados y aliviados desde Tanes, descontando los caudales bombeados a Tanes, y dada la ausencia de sistemas de aforo que permitan su determinación, los volúmenes teóricos de restitución de caudal ecológico, y usos concesionales. La calidad del cómputo se ve afectada igualmente por el registro de los volúmenes aliviados por la coronación de la presa, que este caso asciende a 1.070 días en la serie histórica.

Dentro de los estudios encaminados a desarrollar una herramienta de ayuda a la decisión en la gestión del sistema de abastecimiento de agua potable, que permita adelantar la respuesta operativa anticipando la posibilidad de incurrir en alguno de los escenarios identificados en el Plan de Emergencia ante situaciones de Sequía, se plantea el desarrollo de un modelo hidrológico para determinar los recursos hídricos disponibles para el abastecimiento de agua potable y su previsible evolución.

Dado que las aportaciones de la subcuenca intermedia prácticamente carecen de regulación eficaz como consecuencia del escaso volumen útil del embalse de Rioseco, como aplicación inicial del modelo, y previamente al desarrollo de los estudios de garantía del sistema de abastecimiento, se considera necesario determinar la calidad de la serie histórica de aportaciones de la subcuenca intermedia. Se estima que estas pueden encontrarse comprometidas tanto por la simplificación derivada de la metodología utilizada en el primer periodo, como por los errores a los que puede inducir la ausencia de sistemas de aforo para la obtención de los caudales realmente restituidos o demandados, en el caso de la metodología del segundo periodo.

Dada la finalidad última de utilizar la modelización para determinar las aportaciones en el embalse de Rioseco, se plantea la calibración del modelo desde el punto de vista de la seguridad para el abastecimiento, priorizando tanto el ajuste del hidrograma simulado para regímenes de caudales bajos, como el ajuste en términos de volumen de aportación acumulada.

Las aportaciones históricas de los embalses obtenidas mediante las metodologías anteriormente indicadas se denominarán en adelante aportaciones observadas.

## Herramienta de modelización

Para realizar la modelización se ha optado por el modelo de simulación hidrológica TETIS en su versión 9.1, por tratarse de un modelo distribuido en el espacio, utilizable a cualquier escala temporal, capaz de simular todos los procesos hidrológicos derivados de la variabilidad espacial del ciclo hidrológico en una cuenca de montaña, con un relieve muy abrupto, con altitudes que se desarrollan entre la cota 376 de la ETAP de Rioseco y los 2104 metros del Pico Torres, un clima de tipo templado-húmedo, y un 70% de la superficie cubierta por vegetación, esencialmente prados y bosques de castaños y hayas (Jiménez, 1994). El modelo además permite obtener resultados en cualquier punto de la cuenca, tiene la posibilidad de activar un potente módulo de calibración automática (Francés et al, 2007), y ha sido utilizado con éxito para determinar los recursos hídricos en condiciones similares en el País Vasco (IIAMA-UPV, 2004; Vélez y Francés, 2006; URA, 2020).

El modelo TETIS ha sido desarrollado por el Departamento de Ingeniería Hidráulica y del Medio Ambiente de la Universidad Politécnica de Valencia para realizar la simulación hidrológica en cuencas naturales, mediante su descomposición en celdas superficiales en las que permite obtener la respuesta hidrológica ocasionada por la precipitación de lluvia o nieve. Para cada celda considera los diferentes procesos hidrológicos involucrados (Intercepción, retención, infiltración, evapotranspiración, fusión de nieve, percolación, recarga de acuífero, escorrentía superficial, flujo subsuperficial, y flujo base), mediante la realización de un balance hídrico en cada celda, asumiendo que el agua se distribuye en seis niveles o tanques de almacenamiento conceptuales conectados entre sí en los que se desarrollan los diferentes fenómenos, calculando en función del agua almacenada en cada tanque, el flujo entre los mismos, y el flujo entre las diversas celdas, las cuales se interconectan a través de los tanques inferiores los cuales drenan aguas abajo en función de las direcciones determinadas por el modelo digital del terreno, hasta alcanzar la red de drenaje superficial. Una descripción detallada del modelo Tetis puede obtenerse en las referencias (Vélez y Francés, 2004; Francés et al., 2007; Vélez et al., 2009; Dávila-Ordóñez, 2011; Ramos y Francés, 2014).

El modelo TETIS (Dávila-Ordóñez, 2011) requiere de la calibración de nueve parámetros a través de los denominados Factores Correctores: almacenamiento estático (FC1), evapotranspiración (FC2), infiltración (FC3), escorrentía (FC4), percolación (FC5), interflujo (FC6), pérdidas (FC7), flujo base (FC8) y velocidad del flujo (FC9). Además, permite la activación del módulo de fusión de nieve que incluye otros tres parámetros: coeficientes de fusión de la nieve sin ( $CF_{SLL}$ ) y con lluvia ( $CF_{CLL}$ ) y la temperatura base para su fusión (TB). Asimismo, requiere calibrar cuatro variables de estado inicial: almacenamiento estático (H1), humedad del suelo en el almacenamiento de superficie (H2), almacenamiento gravitacional (H3) y almacenamiento del acuífero (H4). El proceso de calibración puede realizarse de manera automática, mediante la utilización de un módulo del programa para la mayoría de los elementos anteriores.

El módulo de optimización automática del modelo TETIS cuenta con las siguientes funciones objetivo para maximizar o minimizar según sea el caso: error en el volumen, error cuadrático medio (RMSE, por sus siglas en inglés), el estimador de máxima verosimilitud heteroescedástico (HMLE, por sus siglas en inglés), índice de eficiencia de Nash y Sutcliffe (NSE por sus siglas en inglés), índice de eficiencia de Nash y Sutcliffe modificado para considerar el error en volumen, índice de Kling y Gupta, error de los logaritmos y error gaussiano autocorrelacionado (AMLE por sus siglas en inglés) (IIAMA-UPV 2021).

## Estimación de parámetros hidrogeológicos espaciales

Para desarrollar un modelo distribuido es necesario la estimación inicial de determinados parámetros característicos a escala de celda. Para ello se ha partido de un modelo digital del terreno obtenido del Instituto Geográfico Nacional (IGN) con una precisión de 25 metros. El mapa de permeabilidades utilizado para determinar la conductividad hidráulica del acuífero se ha adquirido del Instituto Geológico y Minero de España (IGME) a escala 1:200000. También se ha recopilado la información de conductividad hidráulica saturada de la base de datos *3D Soil Hydraulic Database* (ESDAC), correspondientes a la Demarcación Hidrográfica del Cantábrico Occidental, con una precisión de 250 metros. El mapa de usos del suelo se ha obtenido de *Corine Land Cover* (Copernicus) con una resolución de 100 metros.

La precisión del resto de la información espacial ha aconsejado el utilizar una discretización genérica de 100×100 m para unificar el tamaño de celda de los mapas de parámetros requeridos para la implementación del modelo.

## Información meteorológica

Inicialmente se valoró la utilización de la información meteorológica proporcionada por la Agencia Estatal de Meteorología (AEMet) sobre las estaciones de observación que dispone en la zona, no obstante tras considerar la escasa representatividad espacial que mostraban, se decidió adoptar la información de las series climáticas de precipitación y temperatura que se obtienen de la base de datos elaborada por la AEMet para el periodo 1951-2020, cuyos datos diarios (de 7h a 7h UTC) y que se presentan en una rejilla de unos 5 km generada mediante interpolación estadística a partir del total de estaciones termométricas y pluviométricas manuales disponibles en el Banco Nacional de Datos Climatológico (AEMet, 2020).

## Desarrollo del modelo hidrológico del embalse de Tanes

### Pre calibración o calentamiento

Con el fin de evitar posibles errores, optimizando los tiempos de computación para cada simulación, inicialmente se ha desarrollado un proceso de calentamiento o pre-calibración del modelo utilizando 5 años de la serie de caudales diarios de Tanes (2015-2020), de manera que se puedan detectar fallos en la calibración del modelo a la vez que se determinan los rangos óptimos de cada factor corrector, obteniendo una primera aproximación de la calidad de los datos de partida.

## Calibración

Durante la fase de calibración se ajusta el modelo TETIS utilizando las aportaciones medias diarias en régimen natural vertientes al embalse de Tanes. Para ello, el periodo de calibración se limitó a los últimos 9 años hidrológicos (desde 2011 hasta 2020), dada la necesidad de revertir la alteración que para el régimen natural suponen los caudales detraídos en la captación de Los Arrudos y la imposibilidad de obtener información para años anteriores.

Cabe destacar el reducido intervalo de tiempo utilizado para calibrar el modelo, considerando que la serie de caudales medios diarios registrados en el embalse de Tanes data desde 1978 hasta 2020, ya que habitualmente se suele emplear un intervalo equivalente a 2/3 de la serie completa, dedicando el tercio restante para la validación. Sin embargo, en este caso, dada la relevancia que presenta el caudal concesional detraído en Los Arrudos (200 L/s) en relación al régimen natural en periodos de aguas bajas y estiaje, y para evitar errores ligados a la estimación de esta captación, se decide emplear en la optimización automática únicamente el intervalo de tiempo en el que se dispone de información sobre los caudales realmente detraídos en escala diaria.

Siendo uno de los objetivos de la modelización la determinación de los recursos hidráulicos disponibles, se han establecido como funciones objetivo más representativas el índice de eficiencia de Nash y Sutcliffe (NSE), su derivación del NSE por rangos y error en el volumen (%errVol). La optimización se fundamenta en la aplicación de estos indicadores en ocho calibraciones con distintas hipótesis permitiendo afinar la predicción en regímenes de aguas bajas o estiaje, las cuales se denominan como: Calibración A, Calibración B, Calibración C, Calibración D1, Calibración D2, Calibración E, Calibración F y Calibración G.

Inicialmente, en la “Calibración A”, se aplica el índice de eficiencia de Nash y Sutcliffe, comúnmente empleado en la evaluación de modelos hidrológicos al involucrar la estandarización de la varianza residual y proporcionando un valor que no depende de la longitud del registro o la variable (Kachroo y Natale, 1992, citado en Kothyari y Singh, 1999). Ajustando un total de once parámetros (ocho factores correctores, exceptuando el FC7, y otros tres ligados a la fusión de nieve).

A continuación, se selecciona el índice de eficiencia de Nash y Sutcliffe por rangos de caudal en las calibraciones B, C, E, F, G, aplicando diferentes prioridades o pesos a cada intervalo (Tabla 1). Tanto intervalos como rangos han sido determinados de tal manera que se favorece el ajuste en periodos de aguas bajas.

**Tabla 1** | Intervalos de caudal y distribución de pesos de las calibraciones lanzadas con el Índice de eficiencia de Nash y Sutcliffe por rangos.

| Calibración | Función objetivo: NSE por rangos |                |                              |                |                          |                |
|-------------|----------------------------------|----------------|------------------------------|----------------|--------------------------|----------------|
|             | Rango Q <sub>1</sub>             | P <sub>1</sub> | Rango Q <sub>2</sub>         | P <sub>2</sub> | Rango Q <sub>3</sub>     | P <sub>3</sub> |
| B           | Q < 2 m <sup>3</sup> /s          | 0.5            | 2 < Q < 10 m <sup>3</sup> /s | 0.25           | Q > 10 m <sup>3</sup> /s | 0.25           |
| C           | Q < 2 m <sup>3</sup> /s          | 0.8            | 2 < Q < 10 m <sup>3</sup> /s | 0.1            | Q > 10 m <sup>3</sup> /s | 0.1            |
| E           | Q < 2 m <sup>3</sup> /s          | 0.65           | 2 < Q < 10 m <sup>3</sup> /s | 0.25           | Q > 10 m <sup>3</sup> /s | 0.1            |
| F           | Q < 2 m <sup>3</sup> /s          | 1              | 2 < Q < 10 m <sup>3</sup> /s | 0              | Q > 10 m <sup>3</sup> /s | 0              |
| G           | Q < 1 m <sup>3</sup> /s          | 0.5            | 1 < Q < 3 m <sup>3</sup> /s  | 0.4            | Q > 3 m <sup>3</sup> /s  | 0.1            |

Finalmente, la calibración denominada “D2” se lleva a cabo en dos partes. Por un lado, se realiza una primera “Calibración D1” utilizando la función objetivo de error en el volumen para ajustar los cinco parámetros que más influyen en el balance de masas: la evapotranspiración, el almacenamiento estático del suelo, los coeficientes de fusión de la nieve sin lluvia y con lluvia y la temperatura base para la fusión de la nieve. Por otro lado, una vez se obtienen los óptimos de estos factores, se asignan en la “Calibración D2”, obviando su ajuste en esta fase, y se optimizan el resto de los factores correctores empleando el Índice de eficiencia de Nash y Sutcliffe.

A modo de resumen, en la Tabla 2 se muestran los factores correctores óptimos recogidos de la fase de calibración y se acompaña de los índices NSE y del sesgo del volumen resultantes tras la simulación.

**Tabla 2** | Resumen de la fase de calibración de Tanes (periodo 2011-2020). Funciones objetivo aplicadas, parámetros óptimos resultantes y ajuste de los índices Nash y sesgo del volumen en cada calibración.

| Calibración | Función Objetivo | Factores correctores |      |      |      |      |        |       |      | Nieve             |                   | Índices |      |                |
|-------------|------------------|----------------------|------|------|------|------|--------|-------|------|-------------------|-------------------|---------|------|----------------|
|             |                  | FC1                  | FC2  | FC3  | FC4  | FC5  | FC6    | FC8   | FC9  | CF <sub>SLL</sub> | CF <sub>CLL</sub> | TB      | NSE  | $\Delta V$ (%) |
| A           | NSE              | 1.96                 | 0.88 | 0.30 | 3.92 | 0.24 | 174.14 | 31.61 | 0.95 | 3.98              | 8.99              | 0.37    | 0.80 | -15.84         |
| B           | NSE rangos       | 1.23                 | 0.96 | 0.32 | 3.73 | 0.29 | 160.98 | 37.76 | 0.86 | 2.50              | 6.96              | 0.40    | 0.79 | -18.17         |
| C           | NSE rangos       | 1.29                 | 0.90 | 0.32 | 4.22 | 0.34 | 147.82 | 38.16 | 1.04 | 4.46              | 8.57              | 0.32    | 0.80 | -16.39         |
| D1          | %ErrVol          | 0.96                 | 0.70 | ---  | ---  | ---  | ---    | ---   | ---  | 4.10              | 8.43              | 0.44    | 0.77 | -6.74          |
| D2          | NSE              | 0.96                 | 0.70 | 0.29 | 7.96 | 0.27 | 130.08 | 27.54 | 0.52 | 4.10              | 8.43              | 0.44    | 0.78 | -6.84          |
| E           | NSE rangos       | 1.28                 | 0.91 | 0.30 | 3.00 | 0.25 | 135.47 | 37.23 | 1.08 | 2.06              | 6.95              | 0.40    | 0.79 | -16.45         |
| F           | NSE rangos       | 1.29                 | 0.84 | 0.25 | 3.20 | 0.23 | 143.91 | 36.60 | 0.73 | 3.76              | 5.90              | 0.39    | 0.79 | -13.34         |
| G           | NSE rangos       | 1.26                 | 0.84 | 0.28 | 3.54 | 0.31 | 194.33 | 38.54 | 1.06 | 3.75              | 6.63              | 0.81    | 0.79 | -13.62         |

Revisando los indicadores que muestran la bondad del ajuste de cada una de las calibraciones, en términos generales, se alcanzan unos índices NSE significativamente elevados (Moriasi et al., 2007), lo que se debe considerar para establecer los factores calibrados con mejor ajuste.

Para la elección del modelo que ofrece las mejores condiciones de simulación se valora en virtud del cumplimiento de los siguientes criterios:

Los caudales simulados se situarán del lado de la seguridad en comparación a los realmente registrados (u observados), es decir, se contemplará el supuesto con una situación más desfavorable a la real para, en caso de evaluar la garantía de abastecimiento, preservar la disponibilidad de recurso hídrico en la subcuenca hidrográfica de Rioseco.

1. El volumen acumulado de las aportaciones simuladas ofrecerá la menor diferencia con respecto a las observadas.
2. El análisis gráfico de cada año hidrológico verifique que el comportamiento de los caudales simulados se ajusta sensiblemente a los observados.

La aplicación de estos criterios para identificar el mejor ajuste hace al modelo fiable de cara a los posteriores análisis de garantía, y de gestión del sistema de abastecimiento ante situaciones de sequía.

Destacan en ese sentido los resultados obtenidos en las calibraciones D1 y D2, ya que presentan una evidente mejora en los indicadores del sesgo del volumen con respecto al resto de simulaciones, y un mejor ajuste para los caudales medios diarios, especialmente en periodos de estiaje (Figura 2), ya que este es el principal objetivo del presente estudio.

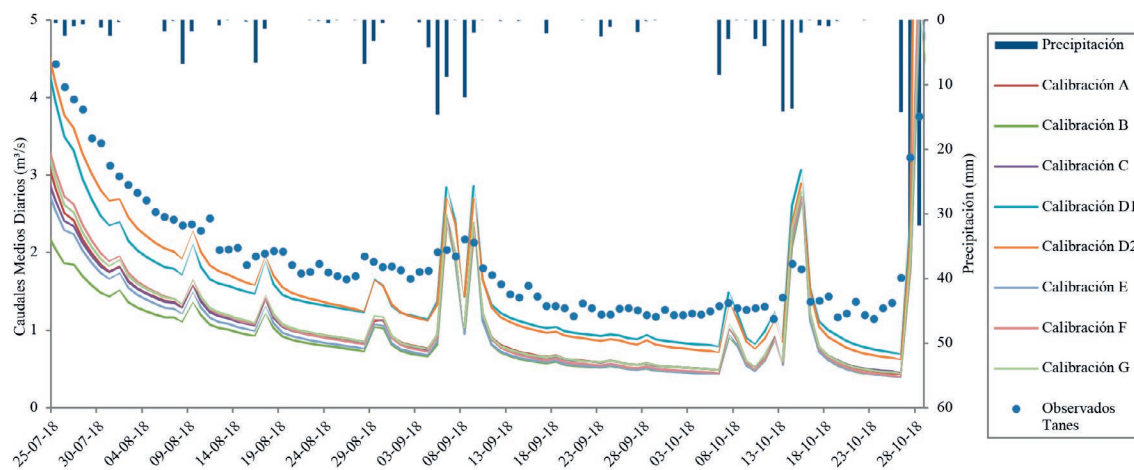

**Figura 2** | Representación de los hidrogramas simulados, observados y el hietograma para el periodo de aguas bajas del año 2018.

En el gráfico anterior, correspondiente al periodo de estiaje del año 2018, se observa como el modelo reproduce adecuadamente los intervalos de precipitación, generando un evidente incremento del caudal medio diario que se ve potenciado en el caso de las calibraciones D1 y D2, lo que también se ve favorecido por un buen ajuste del factor, FC8, ligado al flujo base.

No obstante, se ha desarrollado un análisis gráfico de los resultados obtenidos para los 9 años hidrológicos calibrados con el fin de evaluar la concordancia entre la precipitación diaria y su correspondiente aportación registrada en Tanes (observada) y la calculada con TETIS (simulada). A continuación, se ilustra el gráfico correspondiente al año hidrológico 2017/2018 (Figura 3).

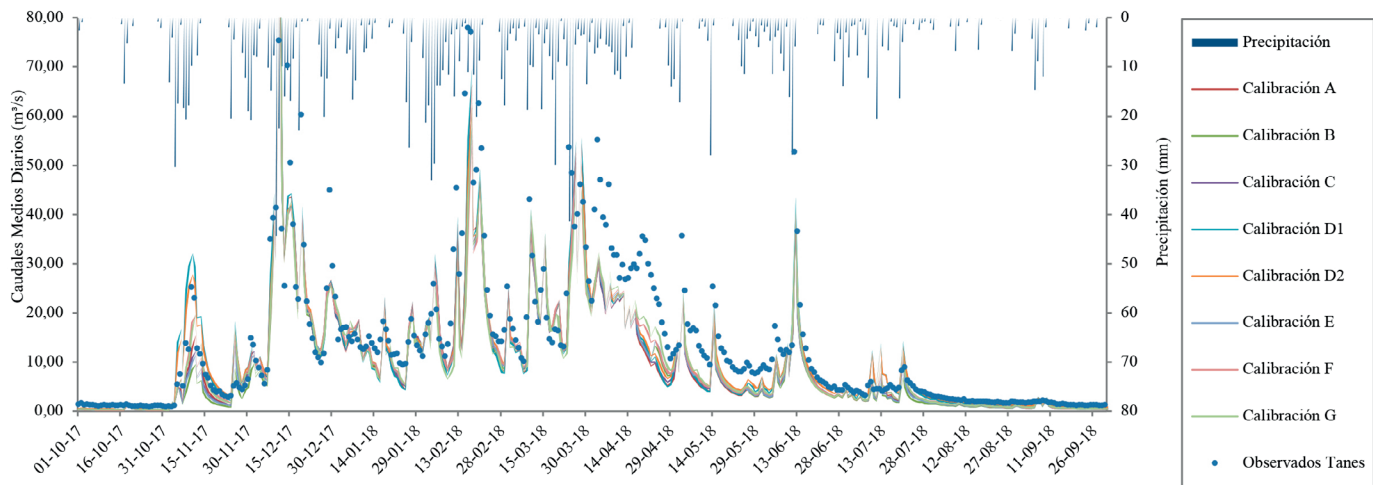

**Figura 3 |** Representación de los hidrogramas simulados, observados y el hietograma para el año hidrológico 2017/2018.

### Validación del modelo

Para comprobar la fiabilidad de la calibración se procede a la validación temporal del modelo de Tanes, de este modo se verifica que los procesos físicos de la cuenca se simulan adecuadamente para un periodo distinto al de calibración, en este caso comprende 33 años de la serie de datos (1978-2011). Así mismo, se ejecutan tantas validaciones como calibraciones realizadas y se aplican los óptimos resultantes del proceso anterior, obteniendo unos índices NSE ligeramente inferiores a los recogidos anteriormente.

**Tabla 3 |** Resultado de los índices Nash y sesgo del volumen tras la validación temporal en Tanes (periodo 1978-2011).

| Validación | Función objetivo | Índices |                |
|------------|------------------|---------|----------------|
|            |                  | NSE     | $\Delta V$ (%) |
| A          | NSE              | 0.65    | -7.96          |
| B          | NSE rangos       | 0.66    | -10.23         |
| C          | NSE rangos       | 0.66    | -8.02          |
| D1         | %errVol          | 0.58    | 2.90           |
| D2         | NSE              | 0.63    | 2.87           |
| E          | NSE rangos       | 0.65    | -8.52          |
| F          | NSE rangos       | 0.63    | -4.94          |
| G          | NSE rangos       | 0.63    | -5.21          |

En lo que respecta al periodo de validación, se destaca el hecho de que no se dispone de información sobre la serie real de detracciones efectuadas en Los Arrudos, por lo que el efecto de estos 200 L/s no se consideran en la comparación con TETIS; Si bien se estima que esta circunstancia no resulta significativa para la generación de los caudales simulados, sí que influye en el cálculo de los índices. Concretamente, se puede observar la variación del sesgo del volumen en las validaciones D1 y D2, en este caso se encuentra sobreestimado, mientras que si se considerase una captación constante de unos 200 L/s este índice se aproximaría a 0.



En el siguiente gráfico (Figura 4) se incorpora una demostración del resultado de las aportaciones diarias simuladas en la fase de validación correspondiente al periodo de aguas bajas de 2008. Se puede apreciar como la serie de caudales simulados se encuentra sobreestimada en varios días del periodo que va desde el 14 de julio hasta el 16 de septiembre, especialmente en lo relativo a las validaciones D1 y D2, tal y como se comenta en el párrafo anterior.

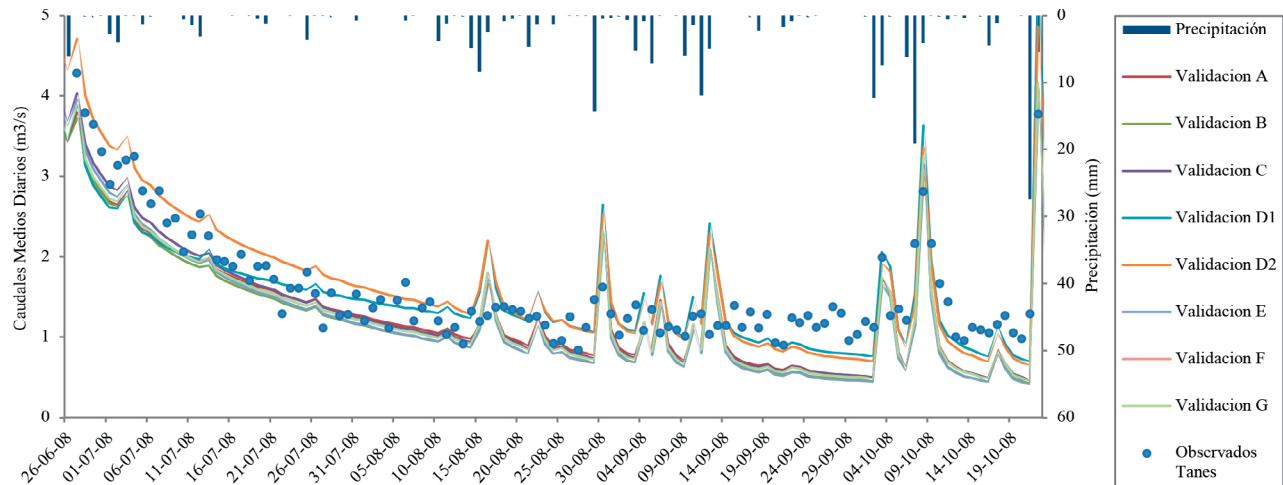

**Figura 4** | Representación de los hidrogramas simulados, registrados y el hietograma para el periodo de aguas bajas del año 2008.

Análogamente a lo comentado en el apartado de calibración, se considera relevante valorar la calidad del ajuste para la totalidad de la serie histórica validada comparando gráficamente las aportaciones diarias observadas y simuladas con el hietograma. A modo de ejemplo, se muestra el año hidrológico 2007/2008 (Figura 5), donde se observa como la predicción reproduce debidamente los intervalos de lluvia, destacando la precisión de la validación D1 y D2.

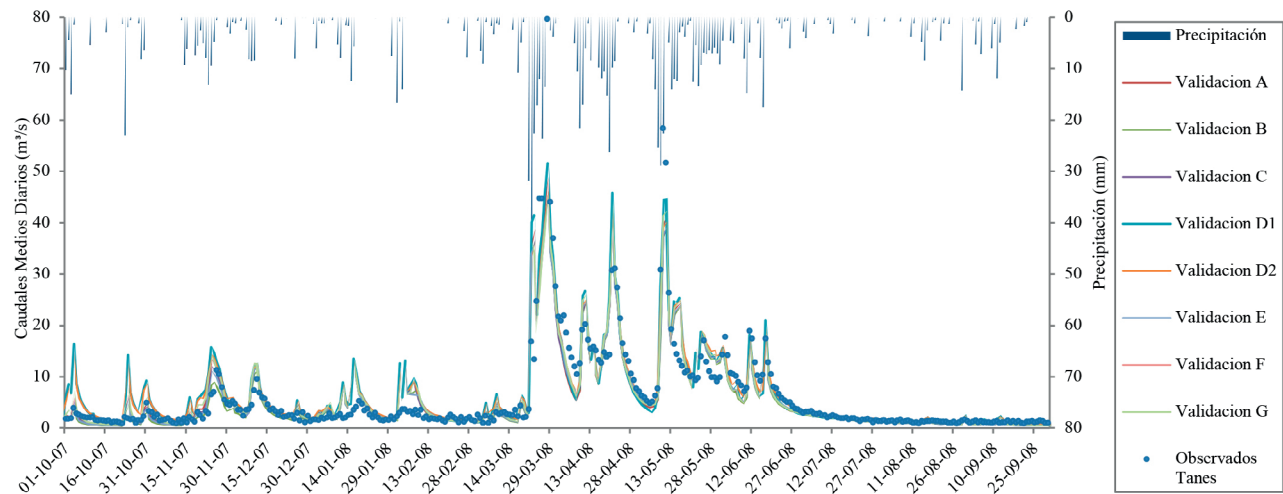

**Figura 5** | Representación de los hidrogramas simulados, observados y el hietograma para el año hidrológico 2007/2008.

En base a lo descrito, se determina que los factores correctores óptimos para generar las aportaciones finales del modelo Tanes-Rioseco se corresponden con los obtenidos en la calibración D2, ya que presenta la menor diferencia en volumen acumulado, un buen índice NSE para la fase de validación, y los caudales simulados presentan un muy buen ajuste gráfico en periodos de aguas bajas, respondiendo con sensibilidad a la evolución de la pluviosidad.

## RESULTADOS Y DISCUSION

Con la intención de comprobar la veracidad y validez de las series históricas de aportación al embalse de Rioseco, se analizan las aportaciones simuladas en la subcuenca intermedia generadas a partir de la aplicación de los parámetros calibrados en Tanes, siendo factible esta interpretación por la similitud y cercanía de dichas cuencas.

Para ello, se procede a aplicar el modelo sobre toda la cuenca vertiente a Rioseco, calculando las aportaciones correspondientes para la subcuenca intermedia (subcuenca del río del Alba e intercuenca), mediante la diferencia de aportaciones simuladas entre los embalses de Tanes y Rioseco.

A continuación, se expondrán los resultados de la comparación entre las series históricas y los resultados del modelo en términos de aportación por año hidrológico puesto que supone el rango más adecuado para efectuar los análisis de garantía.

En la Figura 6 y para el caso de Tanes, se muestran los resultados de las aportaciones simuladas con TETIS y las observadas (históricas observadas según procedimientos descritos) presentando una similitud significativa teniendo en cuenta el amplio rango de magnitud entre las aportaciones mínimas y máximas según año hidrológico, que, de manera aproximada, varía entre los 155 hm<sup>3</sup> y 439 hm<sup>3</sup>.

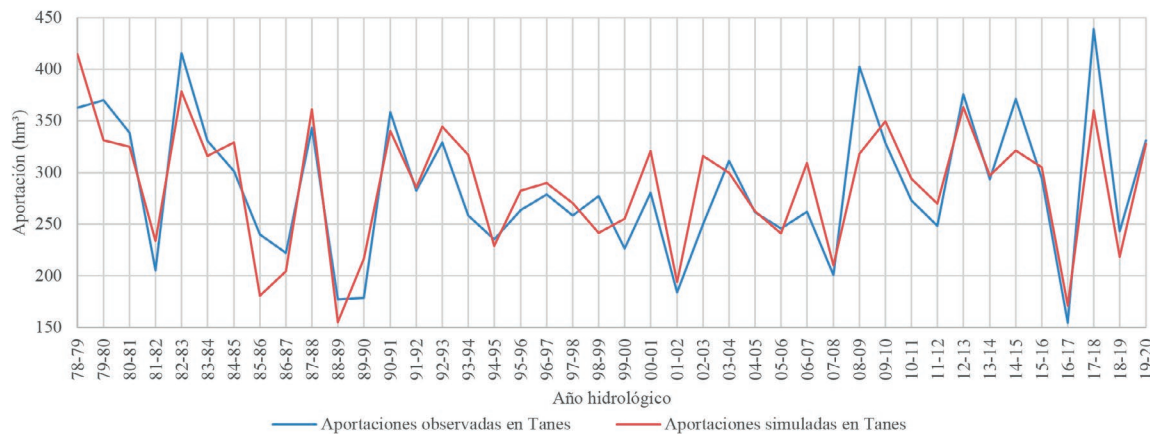

**Figura 6** | Aportaciones acumuladas en año hidrológico en la subcuenca hidrográfica del embalse de Tanes.

Así mismo, en la Figura 7 se muestra la correlación obtenida entre las aportaciones simuladas y las observadas en el embalse de Tanes, permitiendo evaluar la calidad del ajuste. El análisis resultante de la comparativa según año hidrológico muestra una calidad de ajuste significativamente elevada, con un coeficiente de determinación de 0.75, lo que indica una predicción más que favorable dado el limitado tamaño de la muestra, el cual se reduce a los 42 años simulados.

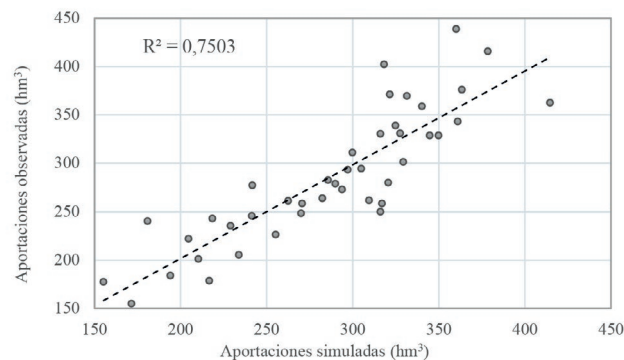

**Figura 7** | Correlación entre las aportaciones anuales observadas y las simuladas en la subcuenca de Tanes.

En la Tabla 4, se puede observar como la comparativa entre las aportaciones modelizadas y las observadas en Tanes presentan un ajuste muy bueno tanto en términos de aportación acumulada en toda la serie histórica, como en términos de aportaciones mínimas y medias mensuales.

**Tabla 4** | Resultados del análisis comparativo entre las aportaciones anuales (año hidrológico) observadas y simuladas en la cuenca de Tanes.

| Aportación Tanes (hm <sup>3</sup> ) | Simuladas | Observadas | Diferencia simuladas vs. observadas | % simuladas vs. observadas |
|-------------------------------------|-----------|------------|-------------------------------------|----------------------------|
| Total acumulada                     | 10 655.74 | 10 605.94  | 49.80                               | 0.47%                      |
| Máxima anual                        | 378.55    | 438.82     | -60.27                              | -13.7%                     |
| Media anual                         | 280.41    | 279.10     | 1.31                                | 0.5%                       |
| Mínima anual                        | 155.22    | 154.78     | 0.44                                | 0.3%                       |

Sin embargo, al aplicar el modelo a la subcuenca intermedia, en la Figura 8, se observan diferencias importantes entre las aportaciones anuales observadas (según el procedimiento descrito) y las simuladas, teniendo en cuenta en este caso el reducido margen de variación entre las aportaciones mínimas y máximas.

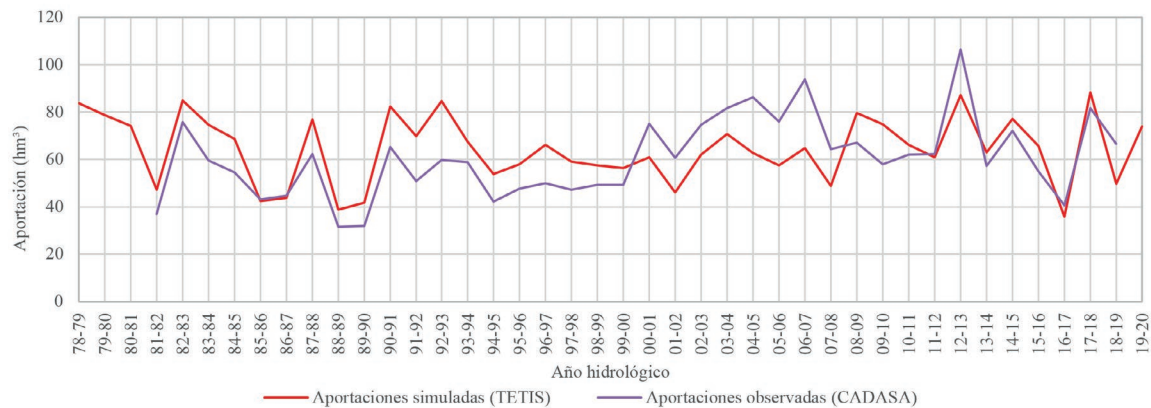

**Figura 8** | Aportaciones acumuladas en año hidrológico en la subcuenca intermedia.

A diferencia del gráfico de dispersión obtenido al analizar las aportaciones de Tanes, en este caso, la bondad del ajuste disminuye considerablemente para la subcuenca intermedia (Figura 9) al correlacionar las aportaciones observadas con las simuladas con TETIS por año hidrológico, obteniendo un coeficiente  $R^2$  de 0.38, el cual es realmente bajo.

La citada carencia de similitud entre las aportaciones anuales se pone también de manifiesto en la elevada discrepancia entre los valores anuales máximos y mínimos (Tabla 5).

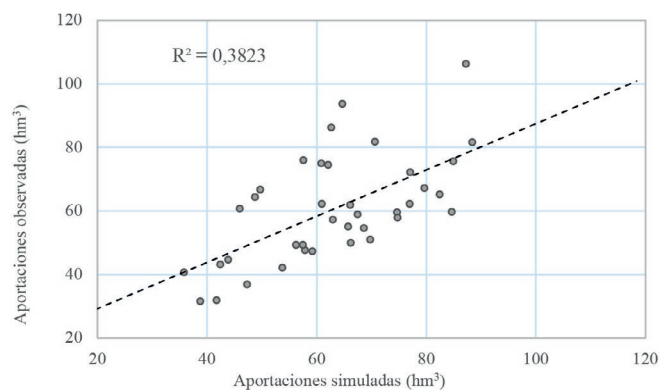

**Figura 9** | Correlación entre las aportaciones anuales observadas por CADASA y las simuladas en la subcuenca intermedia.

**Tabla 5** | Resultados del análisis comparativo entre las aportaciones anuales observadas históricamente por Cadasa y las simuladas en la subcuenca intermedia.

| Aportación cuenca intermedia (hm <sup>3</sup> ) | Simuladas | Observadas | Diferencia simuladas vs. observadas | % simuladas vs. observadas |
|-------------------------------------------------|-----------|------------|-------------------------------------|----------------------------|
| Total acumulada                                 | 2396.84   | 2302.87    | 93.97                               | 4.1%                       |
| Máxima anual                                    | 88.36     | 106.44     | -18.08                              | -17.0%                     |
| Media anual                                     | 63.07     | 60.60      | 2.47                                | 4.1%                       |
| Mínima anual                                    | 35.81     | 31.61      | 4.19                                | 13.3%                      |

## CONCLUSIONES

El régimen de restitución de caudales ecológicos de los embalses de Tanes y Rioseco ha sido modificado recientemente tras la aprobación del Plan de Implantación y Gestión Adaptativa del régimen de caudales ecológicos, desarrollado en el ámbito de la planificación hidrológica de la cuenca, por lo que se hace necesario analizar cómo afecta el nuevo régimen de explotación de los embalses sobre la garantía del sistema de abastecimiento.

Previamente y con la finalidad de determinar la calidad de los datos históricos de las aportaciones recibidas en el embalse de Rioseco, que hasta la fecha han sido estimadas mediante técnicas que carecen del rigor necesario, se ha implementado un modelo hidrológico de la cuenca alta del río Nalón. Mediante el citado modelo es posible obtener una serie completa de aportaciones del sistema Tanes-Rioseco, con el que se refleje la realidad de las características físicas y climáticas de la cuenca en condiciones de estiaje. Para ello, se emplea el modelo TETIS, con el que se obtienen unos resultados del proceso de calibración-validación muy favorables, con índices de Nash-Sutcliffe de 0.78 y 0.63 respectivamente. Además, tras generar las aportaciones de la subcuenca vertiente al embalse de Tanes y analizar su cómputo según año hidrológico, se obtiene un coeficiente de determinación de 0.75 fruto de correlacionar las aportaciones simuladas con las observadas, lo que demuestra una buena calidad de ajuste del modelo.

La aplicación del modelo para determinar el régimen de aportaciones en el embalse de Rioseco, situado a unos 5 km. aguas abajo de Tanes y con un tamaño de subcuenca vertiente un 27% superior, permite concluir que la calidad de la información histórica obtenida por métodos indirectos es poco fiable ya que, en este caso, la correlación de las aportaciones anuales de la subcuenca intermedia entre ambos embalses desciende hasta alcanzar un coeficiente de 0.38, lo que indica una aparente incertidumbre entre el histórico observado y el resultado de la simulación.

## TRABAJOS FUTUROS

La experiencia alcanzada con los trabajos de modelización de la Cuenca alta del río Nalón, serán complementados con la modelización de la Cuenca del río Narcea, en la toma de Quinzanas, por constituir la captación de recurso de este río la única medida de actuación que es posible adoptar en caso de situaciones de alerta por sequía y escasez de recurso en los embalses de Tanes y Rioseco. Esta modelización resulta fundamental para determinar la garantía operacional del sistema de abastecimiento a la zona central de Asturias puesto que apenas se dispone de información alguna referente al régimen de caudales en el punto de toma de la cuenca del río Narcea, desconociendo también la posible limitación que puede suponer para la captación de aguas con destino al consumo urbano e industrial, régimen de caudales ecológicos y otros usos concesionales existentes aguas arriba.

Los resultados derivados de la modelización serán utilizados para efectuar estudios que permitan determinar la garantía del Sistema de abastecimiento, tanto en condiciones habituales de explotación utilizando el recurso del río Nalón, como en condiciones de sequía recurriendo, de forma complementaria, a los recursos del río Narcea. Para ello utilizarán los modelos desarrollados con TETIS para generar la serie de aportaciones mensuales, a considerar conjuntamente con el régimen de demandas del Sistema de abastecimiento, en la modelización del mismo mediante el software AQUATOOL, y así establecer las condiciones de garantía del Sistema, identificando las posibles mejoras operacionales.

Por otra parte, la construcción que se está desarrollando de cuatro estaciones de aforo en la cuenca alta del río Nalón, una de las cuales se emplazará en el tramo final del río Alba, permitirá avanzar en el conocimiento hidrológico del régimen natural, contrastando y perfeccionando en su caso la modelización efectuada.

La finalidad última de todos los estudios de modelización, es avanzar hacia el desarrollo de una herramienta basada en inteligencia artificial, que permita la toma de decisiones en la operación del sistema de abastecimiento, de manera anticipada ante eventuales episodios de sequía.

## REFERENCIAS

- Agencia Estatal de Meteorología (AEMet). 2020. Datos diarios, rejilla 5 km. Disponible en: [http://www.aemet.es/es/serviciosclimaticos/cambio\\_climat/datos\\_diarios?w=2&w2=0](http://www.aemet.es/es/serviciosclimaticos/cambio_climat/datos_diarios?w=2&w2=0)
- Andreu, J., Capilla, J., Sanchís, E. 1996. AQUATOOL, a generalized decision-support system for water-resources planning and operational management. *Journal of hydrology*, 177(3-4), 269-291. [https://doi.org/10.1016/0022-1694\(95\)02963-X](https://doi.org/10.1016/0022-1694(95)02963-X)
- Becerril, E., Osuna A. 1960. *Hidromecánica*, Madrid: Editorial Dossat, SA.
- Confederación Hidrográfica del Cantábrico. 2018. Resolución de 28 de noviembre de 2018, por la que se aprueban los “Planes de Implantación y Gestión Adaptativa del régimen de caudales ecológicos en la Demarcación Hidrográfica del Cantábrico Occidental” y se da por concluido el Programa específico para la implantación del régimen de caudales ecológicos en el ámbito de dicha Demarcación Hidrográfica.
- Consorcio de Aguas de Asturias, Hidrocantábrico. 1978. *Conocimiento de los caudales del río Nalón, en el tramo interesado por el aprovechamiento hidroeléctrico de Tanes y comprobación de los caudales circulantes por La Felguera*. Principado de Asturias, noviembre de 1978.
- Dávila-Ordóñez, M.V. 2011. *Modelación distribuida con “Tetis” dentro del marco del proyecto comparación de modelos distribuidos del NWS de EEUU aplicado en la “Región de Oklahoma”*. Tesis de Máster, Universitat Politècnica de València. Disponible en <http://hdl.handle.net/10251/15748>
- Gutiérrez-Enríquez, M.M., Aristizábal-Rodríguez, H.F. 2007. Implementación del sistema soporte a la decisión Aquatool en la zona centro del departamento del valle del Cauca. *Ingeniería de Recursos Naturales y del Ambiente*, (6), 40-46. Disponible en <https://www.redalyc.org/articulo.oa?id=231120826004>
- Estrada, F. 1994. Garantía en los sistemas de explotación de los recursos hidráulicos. *Monografías CEDEX*, vol. 40.
- European Soil Data Centre, ESDAC. European Commission. Disponible en: <https://esdac.jrc.ec.europa.eu/resource-type/datasets>
- Francés, F., Vélez, J.I., Vélez J.J. 2007. Split-parameter structure for the automatic calibration of distributed hydrological models. *Journal of Hydrology*, 332, 226–240. <https://doi.org/10.1016/j.jhydrol.2006.06.032>
- IIAMA-UPV. Descripción del modelo conceptual distribuido de simulación hidrológica TETIS v.9. Universidad Politécnica de Valencia, enero 2021.
- IIAMA-UPV. Manual de usuario programa TETIS v.9. Universidad Politécnica de Valencia, enero 2021.
- IIAMA-UPV. Modelización de los recursos hídricos de las cuencas de los ríos de la Comunidad Autónoma del País Vasco. Informe Técnico. Instituto de Ingeniería del Agua y Medio Ambiente. Universidad Politécnica de Valencia, 2004.
- Heras, R. 1983. *Recursos hidráulicos: síntesis, metodología y normas*. Cooperativa de Publicaciones del Colegio de Ingenieros de Caminos, Canales y Puertos.
- Instituto Geográfico Nacional, IGN. Centro de descargas. Disponible en: <http://centrodedescargas.cnig.es/CentroDescargas/catalogo.do?Serie=SIOSE>

- Instituto Geológico y Minero de España, IGME. Disponible en: <http://info.igme.es/cartografiadigital/geologica/Magna50.aspx>
- Jiménez, M. 1994. *Geomorfología de la cuenca alta del río Nalón (Cordillera Cantábrica, Asturias)* (Tesis doctoral inédita), 1994.
- Kothyari, U.C., Singh, V.P. 1999. A multiple-input single-output model for flow forecasting. *Journal of Hydrology*, 220, 12-26. [https://doi.org/10.1016/S0022-1694\(99\)00055-4](https://doi.org/10.1016/S0022-1694(99)00055-4)
- Moriasi D.N., Arnold J.G., Van Liew M.W., Bingner R.L., Harmel R.D., Veith T.L. 2007. Model Evaluation Guidelines for Systematic Quantification of Accuracy in Watershed Simulation. *Transaction of ASABE*, 50(3), 885–900 2007 American Society of Agricultural and Biological Engineers. <https://doi.org/10.13031/2013.23153>
- Orozco, I. 2010. *Evaluación del submodelo de fusión de nieve del Modelo TETIS en las cuencas de alta montaña del río American y Carson dentro del proyecto DMIP2*. Tesis de Máster. Departamento de Ingeniería Hidráulica y Medio Ambiente. E.T.S. de Ingenieros de Caminos, Canales y Puertos. Valencia, Universitat Politècnica de València.
- Pérez Guerrero, A. 1994. Estudio de regulación, curvas de garantía, previsión y normas de actuación ante avenidas de los embalses de Tanes y Rioseco. Mayo de 1994.
- Ramos-Fernández, L., Francés-García, F. 2014. Modelación hidrológica distribuida aplicada a la cuenca hidrográfica del río Júcar (España), *Anales Científicos*, 75(2), 324-333. <https://doi.org/10.21704/ac.v75i2.971>
- Sulis, A., Sechi, G.M. 2013. Comparison of generic simulation models for water resource systems. *Environmental Modelling & Software*, 40, 214-225. <https://doi.org/10.1016/j.envsoft.2012.09.012>
- URA-Agencia Vasca del Agua. 2020. Actualización de la evaluación de recursos hídricos de la CAPV, 2020.
- Vélez, J.I., Francés, F. 2004. *La calibración automática en la modelación hidrológica distribuida de tipo conceptual*. *Asamblea Hispano-Portuguesa de Geodesia y Geofísica*, Memorias. Figueira da Foz, Portugal.
- Vélez, J.J., Francés, F. 2006. Recursos hídricos en la comunidad autónoma del País Vasco usando modelación distribuida y calibración automática. XXII Congreso Latinoamericano de Hidráulica ciudad Guayana, Venezuela, octubre 2006
- Vélez, J.I., Vélez, J.J. et al. 2002. Modelo distribuido para la simulación hidrológica de crecidas en grandes cuencas. *3ª Asamblea Hispano-Portuguesa de Geodesia y Geofísica*. Memorias. Valencia.
- Vélez, J.J., Puricelli, M., López Unzu, F., Francés, F. 2009. Parameter extrapolation to ungauged basins with a hydrological distributed model in a regional framework. *Hydrology and Earth System Sciences*, 13, 229-246. <https://doi.org/10.5194/hess-13-229-2009>
